# Supplementary material for: Dendrimer-stabilized silver nanoparticles enable efficient colorimetric sensing of mercury ions in aqueous solution
Source: Royal Society of Chemistry journal article supplement (doi:10.1039/c3ay41331d), 2013-01-01
Supplement: c3ay41331d.pdf [file c3ay41331d.pdf]

## Electronic Supplementary Information

### Dendrimer-stabilized silver nanoparticles enable efficient colorimetric sensing of mercury ions in aqueous solution

Xin Yuan,<sup>a</sup> Shihui Wen,<sup>a</sup> Mingwu Shen,<sup>a</sup> Xiangyang Shi<sup>\*ab</sup>

**Table S1.** The detection of Hg<sup>2+</sup> in different water samples by Ag DSNPs. Found I and Found II are results obtained via SPR peak intensity- and blue shift-based correlation, respectively.

| Sample        | Detection (ppb) | Add (ppb) | Found I (ppb) | Recovery (%) | Found II (ppb) | Recovery (%) |
|---------------|-----------------|-----------|---------------|--------------|----------------|--------------|
| Tap water     | Not Found       | 300.0     | 253.2         | 84.4         | 317.7          | 105.9        |
| Mineral water | Not Found       | 300.0     | 285.6         | 95.2         | 282.3          | 94.1         |
| Lake water    | Not Found       | 500.0     | 240.4         | 80           | 287.2          | 95.7         |

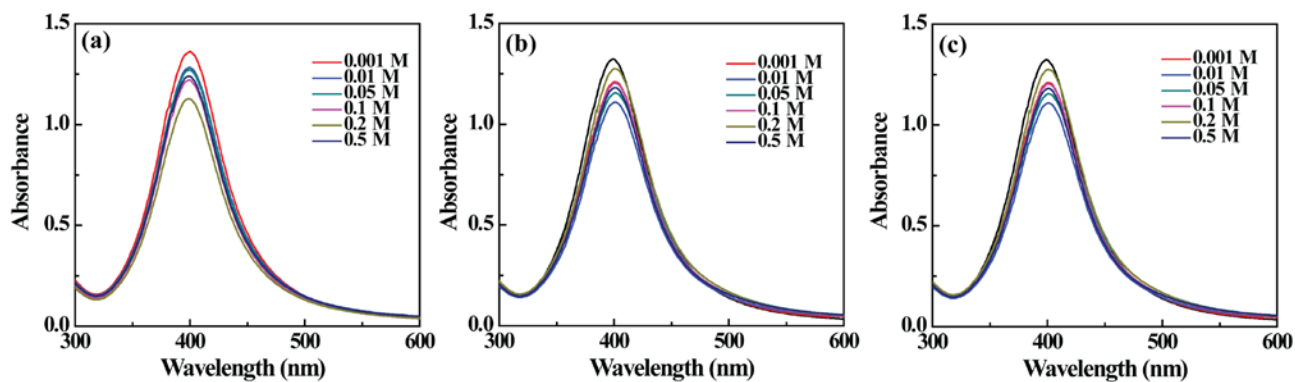

**Figure S1.** UV-Vis spectra of Ag DSNPs (50 µg/mL) under different NaCl (a), KBr (b), and KI concentrations (0.001 M, 0.01 M, 0.05 M, 0.1 M, 0.2 M, and 0.5 M).

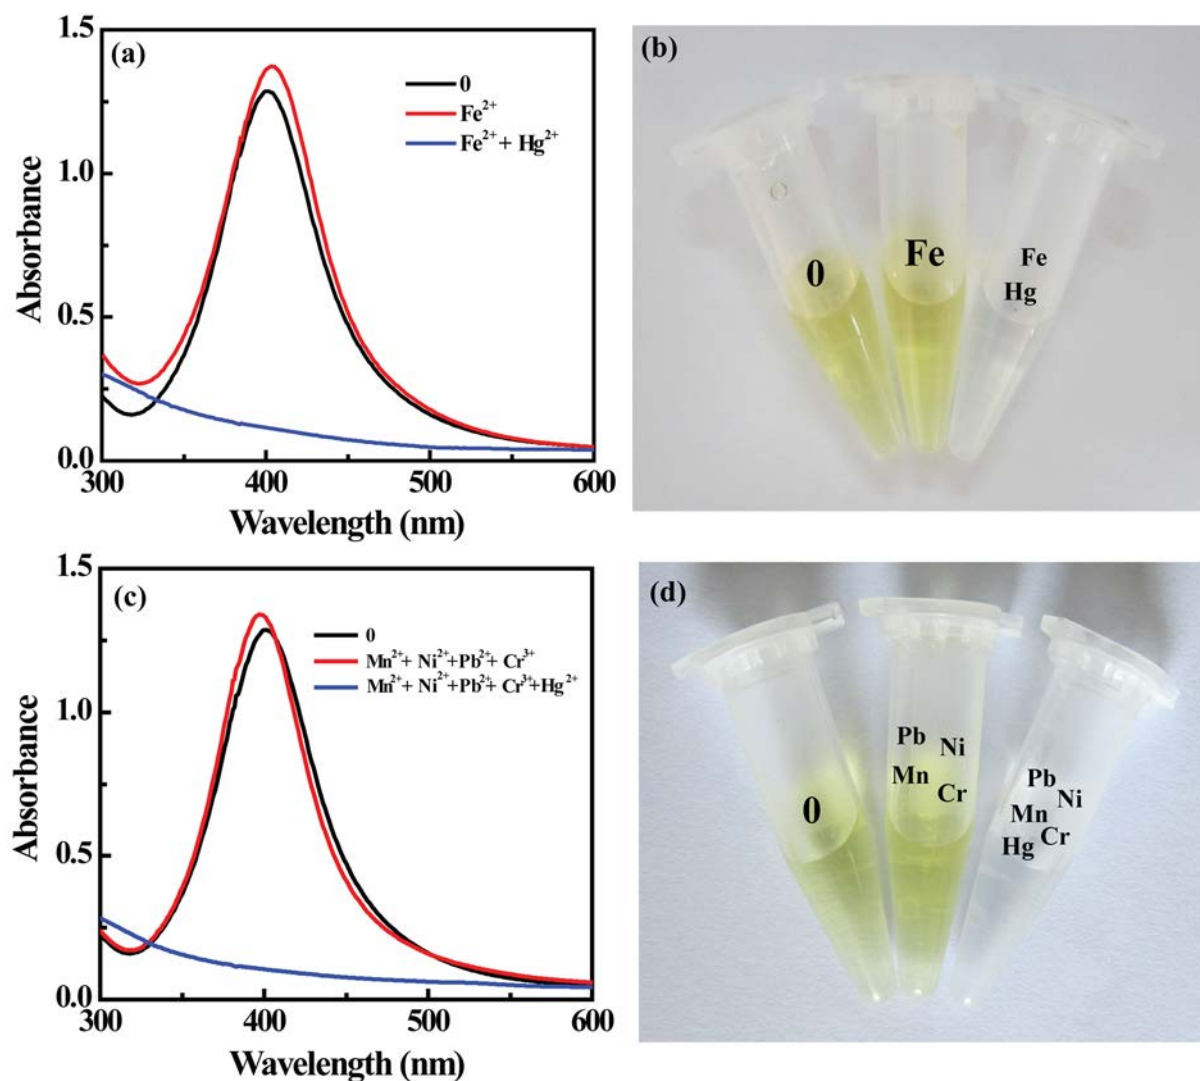

**Figure S2.** (a) UV-Vis spectra and the photographs (b) of Ag DSNP solutions (50  $\mu\text{g/mL}$ ) mixed with  $\text{Fe}^{2+}$  in the absence and presence of  $\text{Hg}^{2+}$ . (c) UV-Vis spectra and the photographs (d) of Ag DSNP solutions (50  $\mu\text{g/mL}$ ) mixed with  $\text{Cr}^{3+}$ ,  $\text{Mn}^{2+}$ ,  $\text{Ni}^{2+}$ , and  $\text{Pb}^{2+}$  in the absence and presence of  $\text{Hg}^{2+}$ . The final concentration of each metal ion is 30 ppm. The  $\text{Hg}^{2+}$  concentration in both cases is 10 ppm. “0” represents the Ag DSNP solution before mixing with other components.

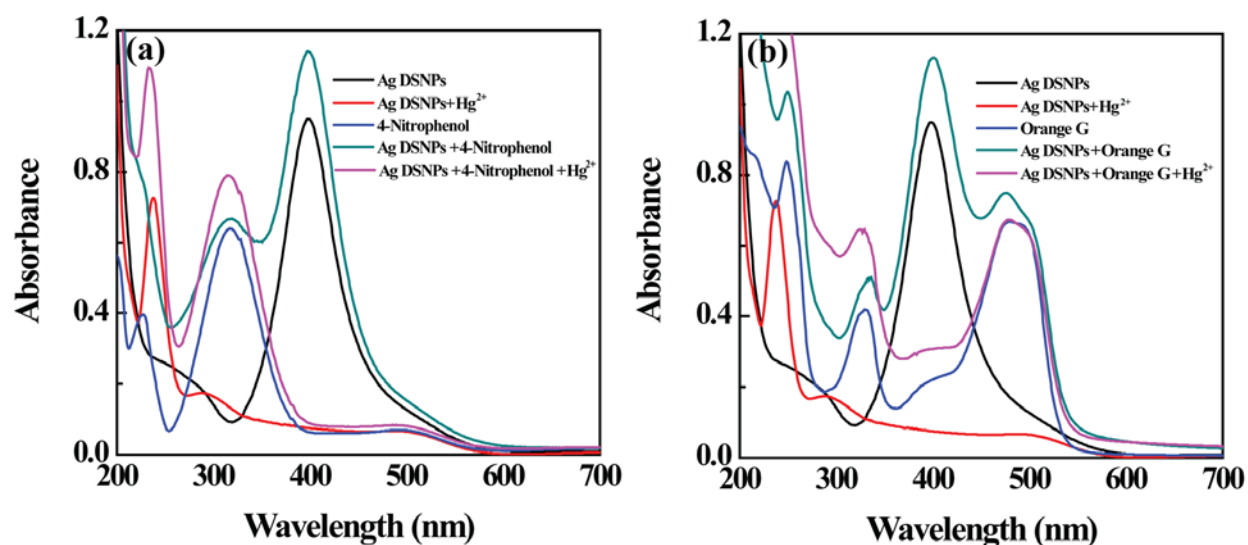

**Figure S3.** (a) UV-Vis spectrum of Ag DSNPs (35  $\mu\text{g/mL}$ ), Ag DSNPs (35  $\mu\text{g/mL}$ ) mixed  $\text{Hg}^{2+}$  (10 ppm), 4-nitrophenol (10  $\mu\text{g/mL}$ ), Ag DSNPs (35  $\mu\text{g/mL}$ ) mixed with 4-nitrophenol (10  $\mu\text{g/mL}$ ), and mixture of Ag DSNPs (35  $\mu\text{g/mL}$ ) and 4-nitrophenol (10  $\mu\text{g/mL}$ ) in the presence of  $\text{Hg}^{2+}$  (10 ppm). (b) UV-Vis spectrum of Ag DSNPs (35  $\mu\text{g/mL}$ ), Ag DSNPs (35  $\mu\text{g/mL}$ ) mixed  $\text{Hg}^{2+}$  (10 ppm), Orange G (20  $\mu\text{g/mL}$ ), Ag DSNPs (35  $\mu\text{g/mL}$ ) mixed with Orange G (20  $\mu\text{g/mL}$ ), and mixture of Ag DSNPs (35  $\mu\text{g/mL}$ ) and Orange G (20  $\mu\text{g/mL}$ ) in the presence of  $\text{Hg}^{2+}$  (10 ppm).
